# Supplementary material for: Frankincense ameliorates endometriosis via inducing apoptosis and reducing adhesion
Source: PubMed Central journal article supplement — Integr Med Res. 2023 Apr 3;12(2):100947. doi: 10.1016/j.imr.2023.100947 (PMC10165193; doi:10.1016/j.imr.2023.100947), 2023-04-03
Supplement: mmc1.pdf [file mmc1.pdf]

## Supplementary materials

### Supplementary methods

#### *Hematoxylin and eosin (H&E) staining*

At the end of experiment, the kidney and liver were excised from euthanized mice. The tissues were fixed with formaldehyde solution, embedded in paraffin block, and sectioned with microtome. The sections were deparaffinized, rehydrated, and with H&E solution for histopathological examination.

#### *KEGG mapping*

After GSEA analysis, KEGG mapping analysis was conducted for visualizing the significantly changed genes in the pathways, including P53 signaling pathway, apoptosis, chemokine signaling pathway, ECM-receptor interaction, and cell adhesion molecules. The maps were visualized by KEGG mapper color tool (<https://www.genome.jp/kegg/mapper/color.html>) according to recent report [1].

### **Supplementary Table list.**

**Table S1.** The possible targets of Fr were collected from TCMID database.

**Table S2.** The KEGG pathway analysis was conducted by Cytoscape with JEPPEETO plugin using possible target genes of Fr.

**Table S3.** The GO\_cellular components analysis was conducted by Cytoscape with JEPPEETO plugin using possible target genes of Fr.

**Table S4.** The GO\_molecular function analysis was conducted by Cytoscape with JEPPEETO plugin using possible target genes of Fr.

**Table S5.** The GO\_biological pathway analysis was conducted by Cytoscape with JEPPEETO plugin using possible target genes of Fr.

**Table S6.** The genes related with endometriosis in DisGeNet database.

The supplementary tables were uploaded as separated Microsoft excel file.

## Supplementary Figures

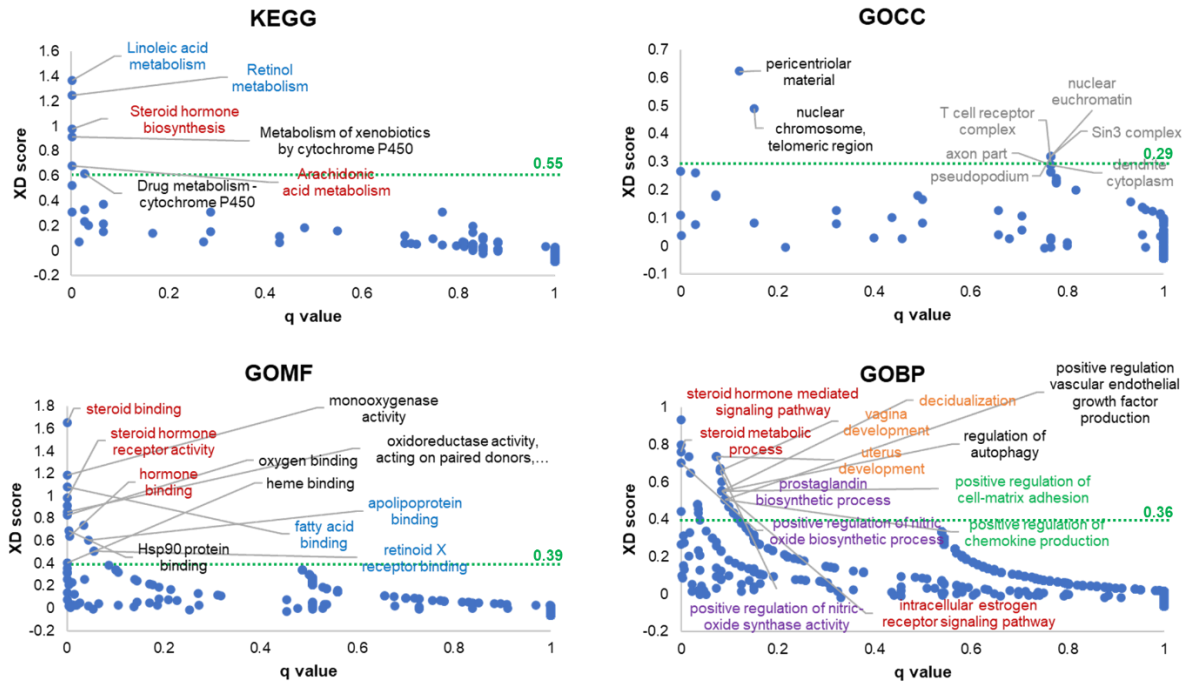

**Fig. S1. Network pharmacological GO analysis suggested the potential therapeutic effect of Fr on endometriosis.** The TCMID database was used to gather the potential target genes for Fr. With the aid of the JEPPETO plugin, Cytoscape performed network studies on these target genes.

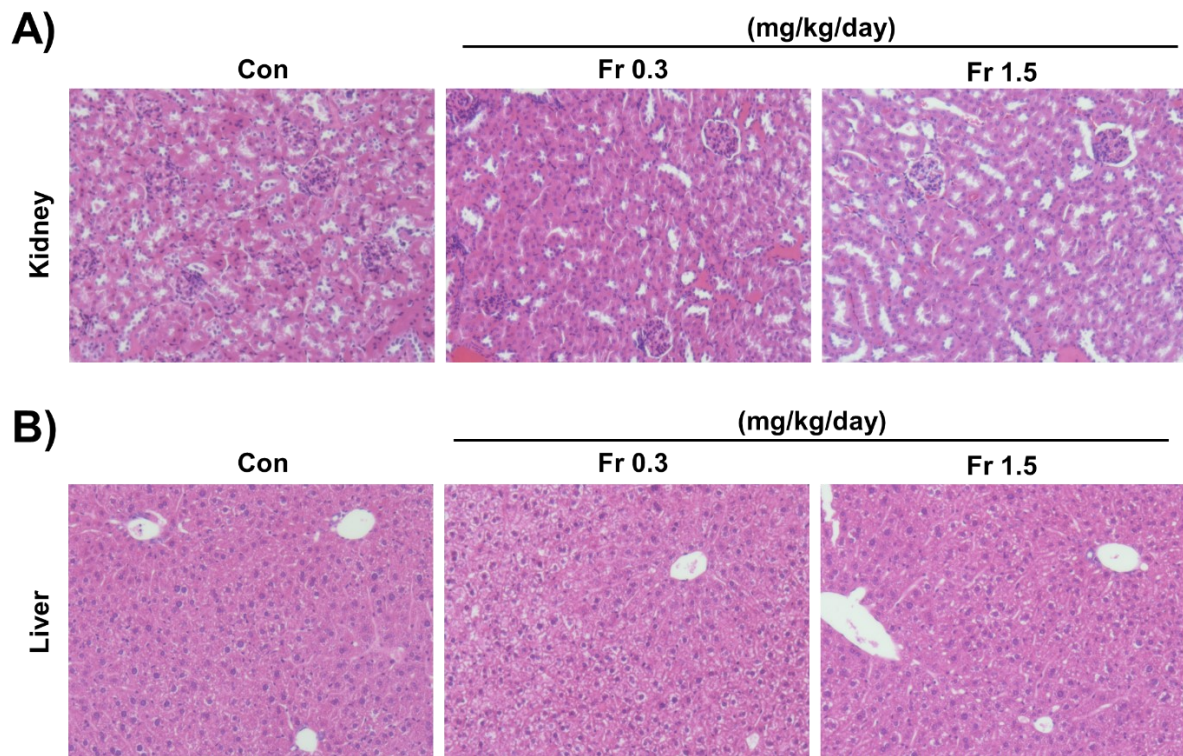

**Fig. S2.** The mice were treated indicated dose of Fr (0.3 or 1.5 mg/kg/day) after induction of endometriosis. The microphotographic images of H&E stained- kidney and liver sections were presented ( $\times 100$ ).

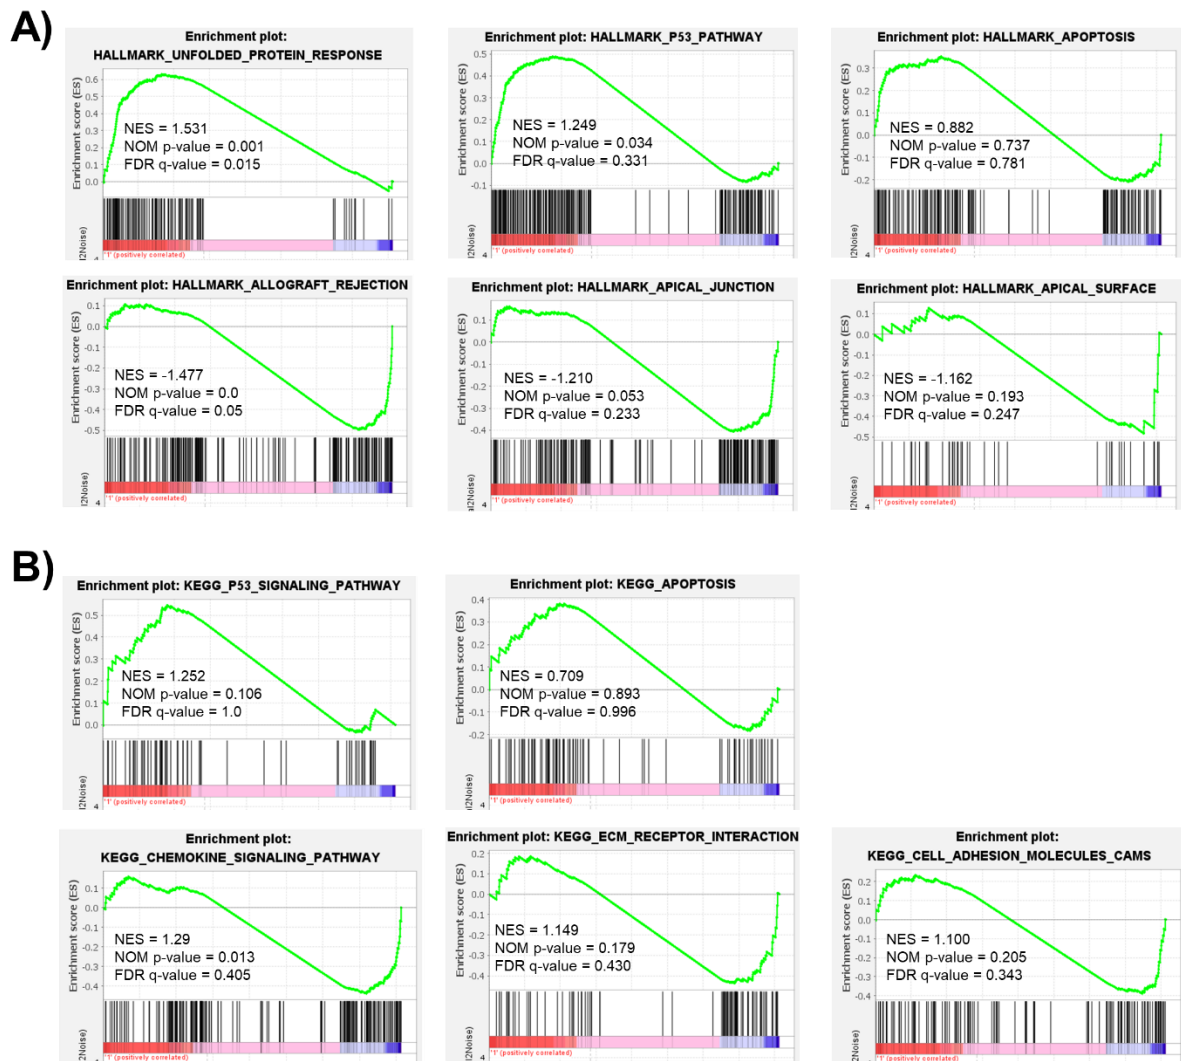

**Fig. S3.** The enrichment plots of significantly changed Hallmark (A) and KEGG (B) pathways by Fr-treatment were presented.

A)

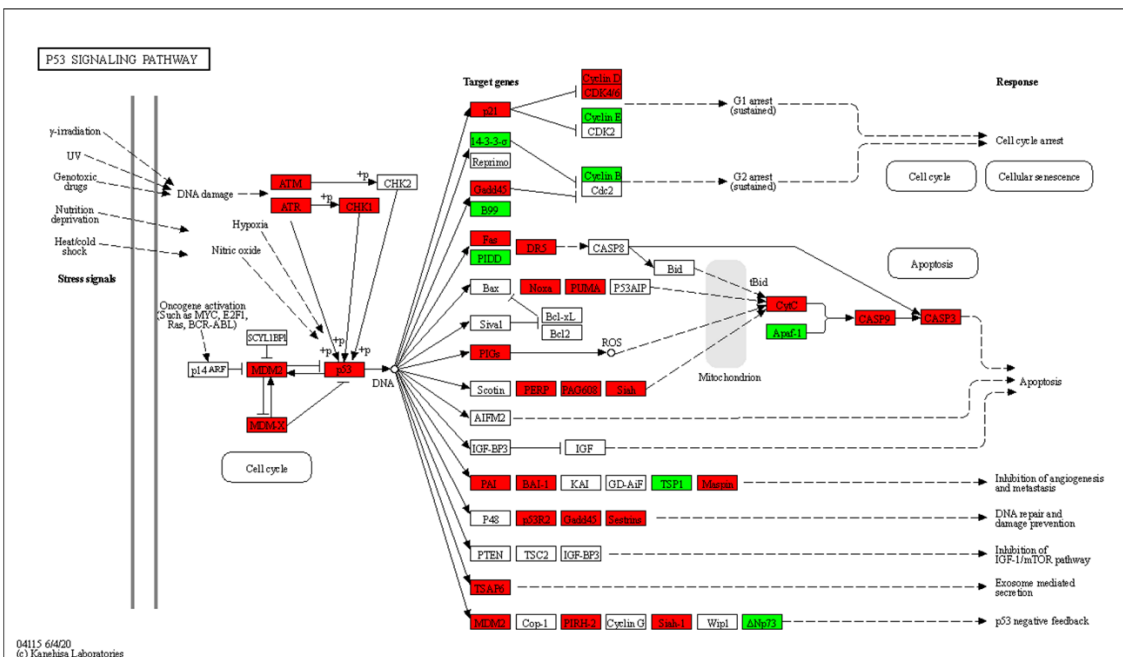

B)

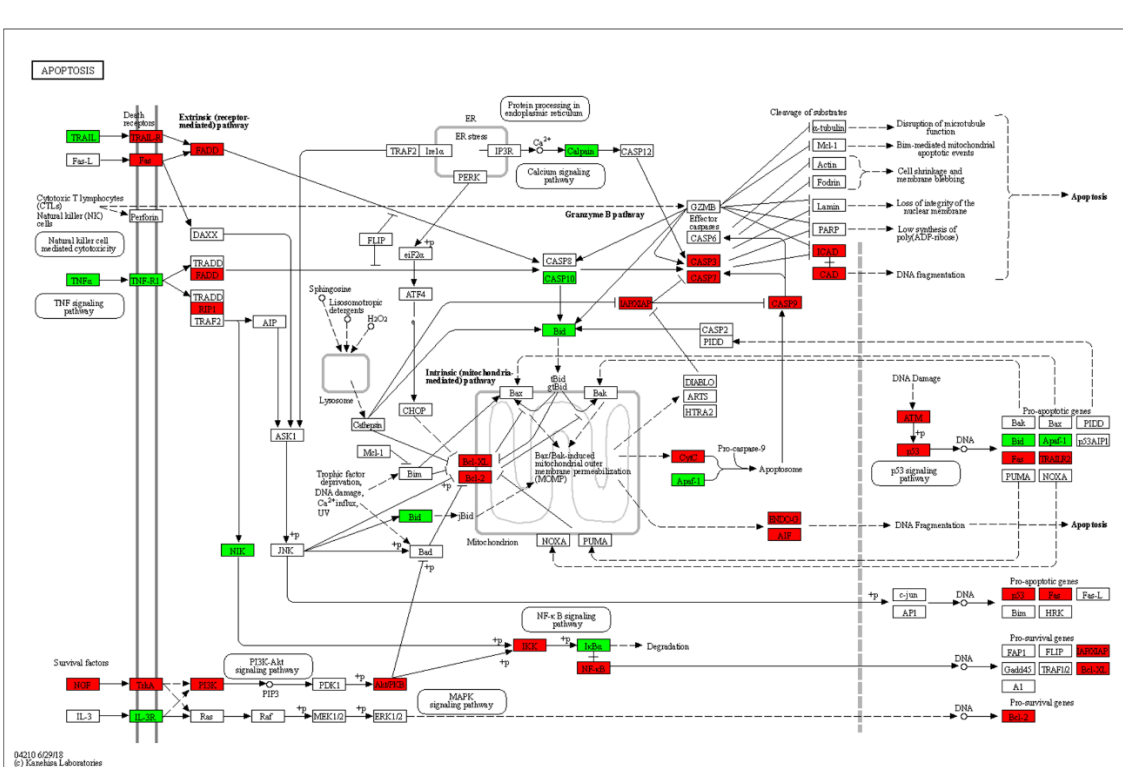

C)

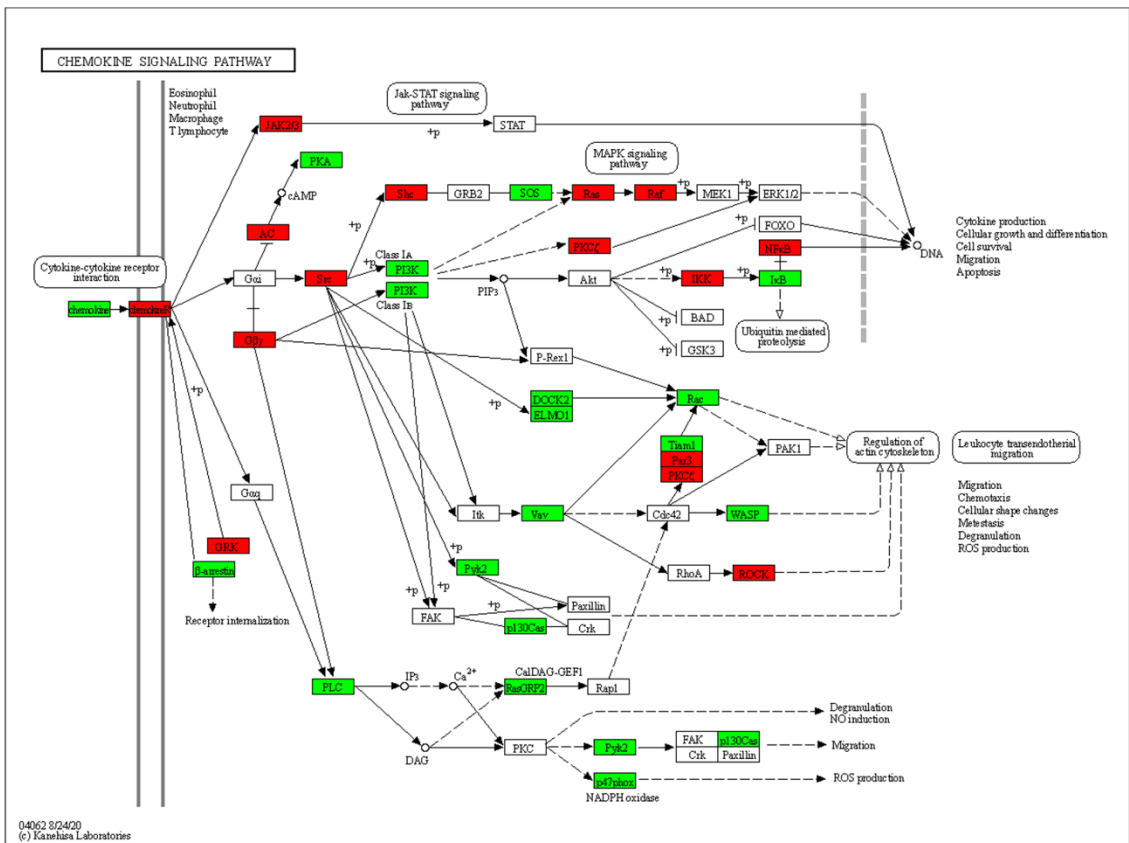

D)

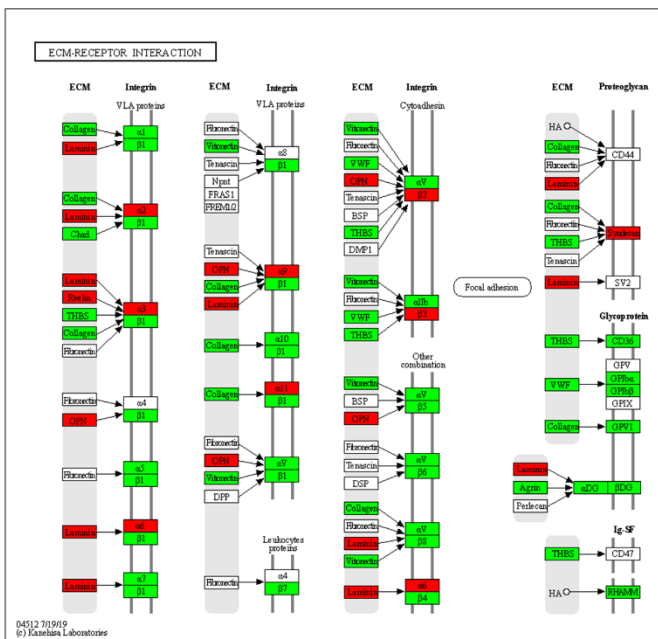

E)

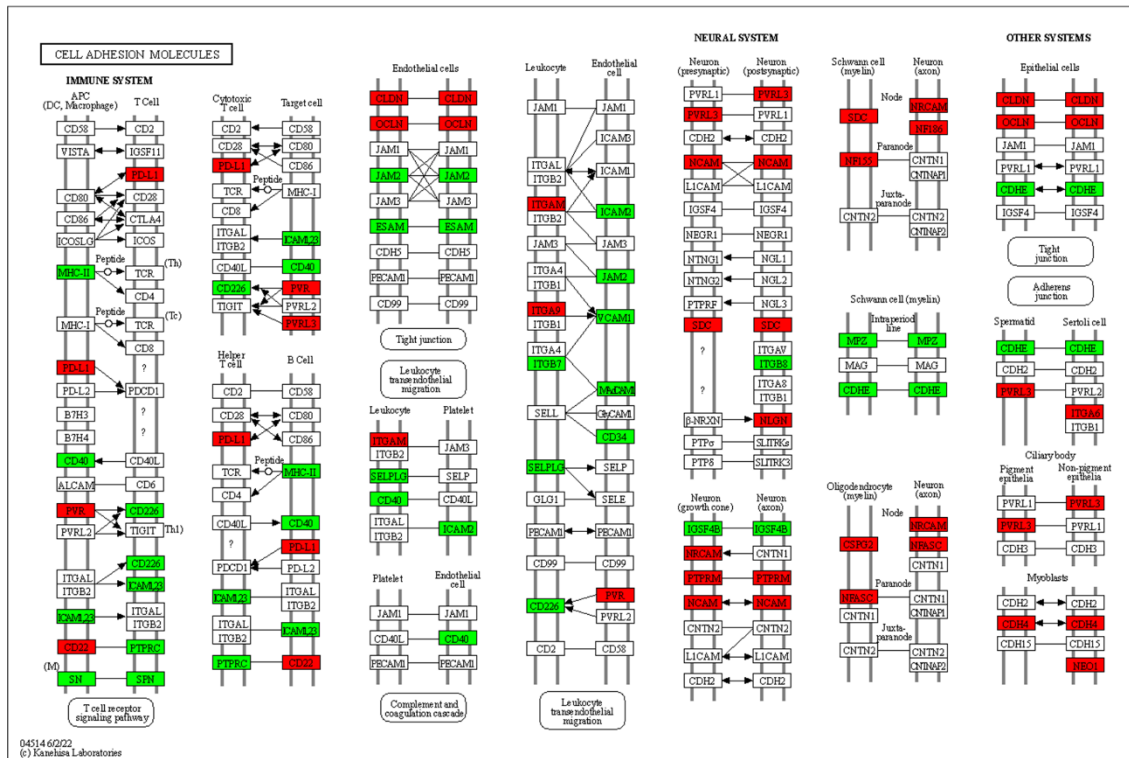

**Fig. S4.** The KEGG pathway map for P53 signaling pathway (A), apoptosis (B), chemokine signaling pathway (C), ECM-receptor interaction (D), and cell adhesion molecules (E) are presented. The maps were visualized by KEGG mapper color tool. The genes significantly upregulated or downregulated by Fr-treatment were indicated by red or green background, respectively.



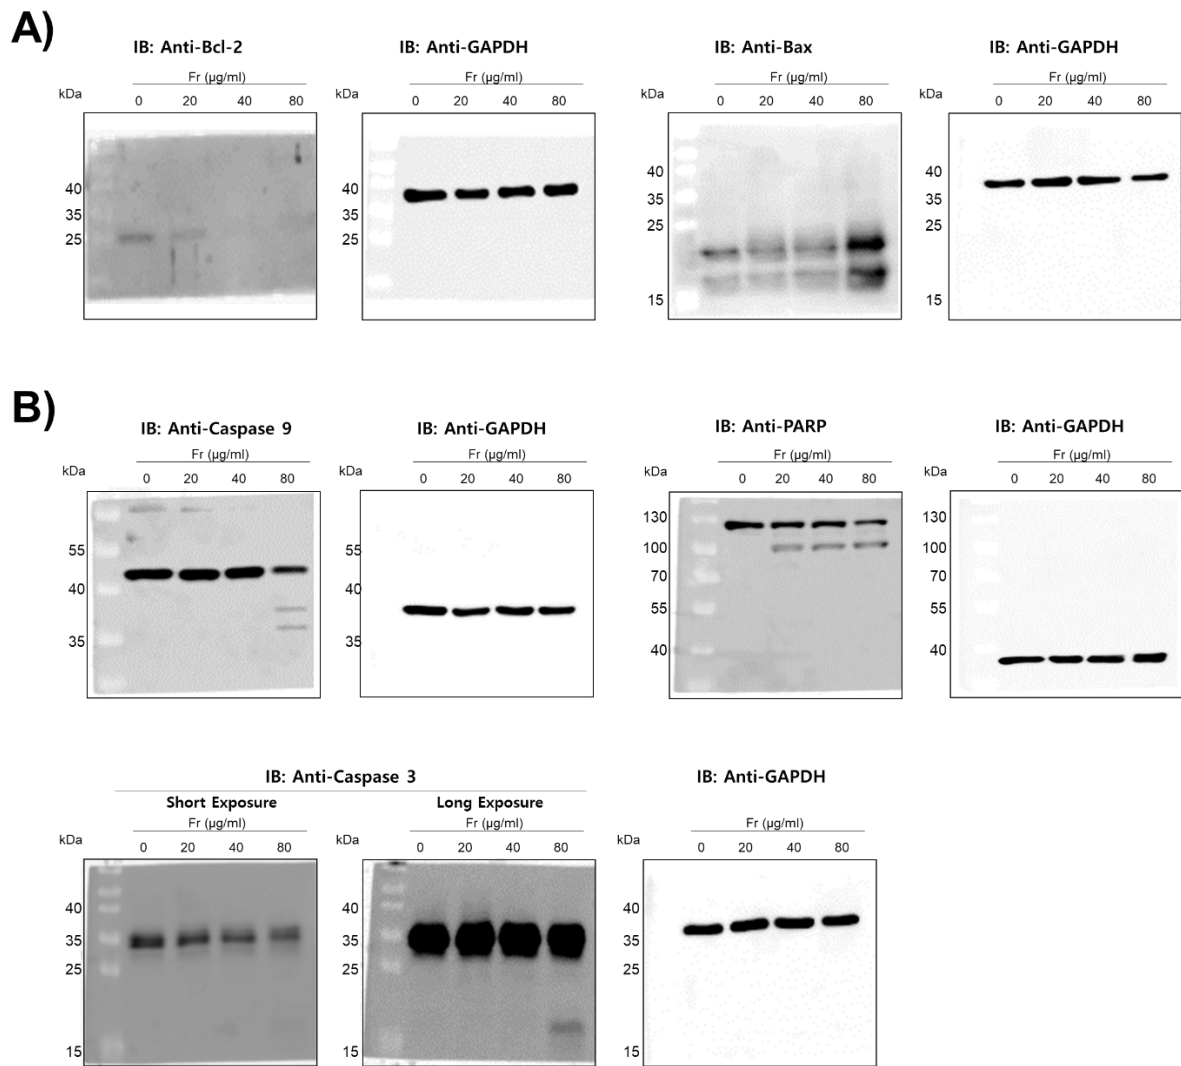

**Fig. S4.** The whole blot used in this study. (A), Figure 5C; (B), Figure 5D.

## Reference

1. Kanehisa, M., Y. Sato, and M. Kawashima, *KEGG mapping tools for uncovering hidden features in biological data*. Protein Sci, 2022. **31**(1): p. 47-53.
